# Supplementary material for: Can Gender Nouns Influence the Stereotypes of Animals?
Source: MDPI journal article supplement (doi:10.3390/ani13162604), 2023-08-12
Supplement: s1 [file s1]

Table S3: Correlations between variables for native Portuguese speakers (above the diagonal) and native English speakers (below the diagonal) regarding the panda bear (\*  $p < .05$ ; \*\*  $p < .01$ )

|                | 1      | 2      | 3      | 4      | 5    | 6      |
|----------------|--------|--------|--------|--------|------|--------|
| 1.COMPETENCE   |        | .465** | .553** | .016   | .235 | -.125  |
| 2.WARMTH       | .510** |        | .184   | -.188  | .018 | .039   |
| 3.ADMIRATION   | .195   | .359*  |        | -.019  | .003 | -.157  |
| 4.THREAT       | -.138  | -.301  | -.203  |        | .102 | -.251* |
| 5.INDIFFERENCE | -.307* | -.359* | -.382* | .484** |      | .048   |
| 6.FEMININITY   | -.17   | -.121  | .038   | .163   | .115 |        |
