# Supplementary material for: Can Gender Nouns Influence the Stereotypes of Animals?
Source: MDPI journal article supplement (doi:10.3390/ani13162604), 2023-08-12
Supplement: s1 [file s1]

Table S5: Correlations between variables for native Portuguese speakers (above the diagonal) and native English speakers (below the diagonal) regarding the polar bear (\*  $p < .05$ ; \*\*  $p < .01$ )

|                | 1      | 2     | 3      | 4      | 5       | 6    |
|----------------|--------|-------|--------|--------|---------|------|
| 1.COMPETENCE   |        | .035  | .443** | .02    | -.395** | .035 |
| 2.WARMTH       | .355** |       | -.013  | -.117  | .028    | .053 |
| 3.ADMIRATION   | .601** | .275* |        | .063   | -.390** | .141 |
| 4.THREAT       | -.074  | -.131 | -.082  |        | .235    | -.12 |
| 5.INDIFFERENCE | -.014  | .295* | -.239* | -.02   |         | .148 |
| 6.FEMININITY   | -.053  | .211  | -.067  | -.241* | .141    |      |
