# Supplementary material for: Can Gender Nouns Influence the Stereotypes of Animals?
Source: MDPI journal article supplement (doi:10.3390/ani13162604), 2023-08-12
Supplement: s1 [file s1]

Table S4: Correlations between variables for native Portuguese speakers (above the diagonal) and native English speakers (below the diagonal) regarding the giraffe (\*  $p < .05$ ; \*\*  $p < .01$ )

|                | 1     | 2      | 3      | 4     | 5      | 6     |
|----------------|-------|--------|--------|-------|--------|-------|
| 1.COMPETENCE   |       | .563** | .336** | -.143 | -.149  | .152  |
| 2.WARMTH       | .143  |        | .433** | -.223 | -.12   | .064  |
| 3.ADMIRATION   | .275  | .045   |        | .055  | -.143  | .067  |
| 4.THREAT       | -.108 | .03    | .084   |       | .472** | -.064 |
| 5.INDIFFERENCE | -.207 | -.044  | .02    | .321* |        | .128  |
| 6.FEMININITY   | -.168 | .096   | -.058  | .101  | -.217  |       |
