# Supplementary material for: Can Gender Nouns Influence the Stereotypes of Animals?
Source: MDPI journal article supplement (doi:10.3390/ani13162604), 2023-08-12
Supplement: s1 [file s1]

Table S6: Correlations between variables for native Portuguese speakers (above the diagonal) and native English speakers (below the diagonal) regarding the cheetah (\*  $p < .05$ ; \*\*  $p < .01$ )

|                | 1      | 2     | 3     | 4      | 5     | 6     |
|----------------|--------|-------|-------|--------|-------|-------|
| 1.COMPETENCE   |        | .312* | .290* | .096   | .023  | -.031 |
| 2.WARMTH       | .202   |       | .17   | -.161  | .101  | -.129 |
| 3.ADMIRATION   | .522** | .138  |       | .149   | -.277 | .02   |
| 4.THREAT       | -.018  | -.149 | -.081 |        | -.041 | -.004 |
| 5.INDIFFERENCE | -.138  | -.13  | -.234 | .322** |       | -.236 |
| 6.FEMININITY   | .121   | .138  | .065  | .135   | .101  |       |
