# Supplementary material for: Can Gender Nouns Influence the Stereotypes of Animals?
Source: MDPI journal article supplement (doi:10.3390/ani13162604), 2023-08-12
Supplement: s1 [file s1]

Table S2: Animal selection criteria for inclusion in Study 2

| Animal     | Preference | Gender noun | Diet      | Selection |
|------------|------------|-------------|-----------|-----------|
| Panda bear | 1          | Male        | Herbivore | X         |
| Koala      | 2          | Male        | Herbivore |           |
| Elephant   | 3          | Male        | Herbivore |           |
| Polar Bear | 4          | Male        | Carnivore | X         |
| Giraffe    | 5          | Female      | Herbivore | X         |
| Cheetah    | 6          | Female      | Carnivore | X         |
| Sloth      | 7          | Female      | Herbivore |           |
| Zebra      | 8          | Female      | Herbivore |           |
