# Supplementary material for: Can Gender Nouns Influence the Stereotypes of Animals?
Source: MDPI journal article supplement (doi:10.3390/ani13162604), 2023-08-12
Supplement: s1 [file s1]

Table S1: Study 1's Cross Tabulation between the 1st and 2nd choices

|   | Koala<br>(1) | Giraffe<br>(2) | Sloth<br>(3) | Polar Bear<br>(4) | Panda bear<br>(5) | Cheetah<br>(6) | Elephant<br>(7) | Zebra<br>(8) |
|---|--------------|----------------|--------------|-------------------|-------------------|----------------|-----------------|--------------|
| 1 |              | 4              | 3            | 1                 | 18                | 2              | 3               | 0            |
| 2 | 0            |                | 1            | 1                 | 1                 | 0              | 6               | 1            |
| 3 | 3            | 0              |              | 0                 | 3                 | 1              | 5               | 1            |
| 4 | 2            | 0              | 0            |                   | 5                 | 7              | 7               | 1            |
| 5 | 15           | 5              | 1            | 9                 |                   | 2              | 5               | 0            |
| 6 | 5            | 1              | 1            | 3                 | 3                 |                | 2               | 1            |
| 7 | 1            | 7              | 1            | 2                 | 3                 | 1              |                 | 0            |
| 8 | 0            | 0              | 0            | 1                 | 0                 | 0              | 0               |              |
